# Supplementary material for: A Transcriptional Profile of Aging in the Human Kidney
Source: PLoS Biol. 2004 Nov 30;2(12):e427. doi: 10.1371/journal.pbio.0020427 (PMC532391; doi:10.1371/journal.pbio.0020427)
Supplement: Table S3 — (135 KB XLS). [file pbio.0020427.st003.xls]

## Sheet: 985
Age-related genes (p<0.001), arranged by p-value
Probe ID = Affymetrix probe ID, Coefficient = Aging coefficient. 985 genes identified to change with age are presented. Genes are identified by Affymetrix probe ID in the first column, and are arranged in order of p-value for change in expression with age (second column). The coefficient for change log2 (expression) with age is given in the third column. Gene names are given in the fourth column,…
Probe ID	p value	Coefficient	Gene	Description
204154_at	1.41e-11	0.00612762	CDO1	cysteine dioxygenase, type I
211990_at	3.57e-10	0.0208165	HLA-DPA1	major histocompatibility complex, class II, DP alpha 1
211530_x_at	1.03e-09	0.0122032	HLA-G	HLA-G histocompatibility antigen, class I, G
208729_x_at	1.86e-09	0.0124679	HLA-B	major histocompatibility complex, class I, B
211911_x_at	8.22e-09	0.0120543	HLA-B	major histocompatibility complex, class I, B
212067_s_at	1.42e-08	0.0223358	C1R	complement component 1, r subcomponent
204806_x_at	2.04e-08	0.0114575	HLA-F	major histocompatibility complex, class I, F
221875_x_at	2.44e-08	0.011168	HLA-F	major histocompatibility complex, class I, F
205350_at	2.64e-08	-0.00625663	CRABP1	cellular retinoic acid binding protein 1
204122_at	4.63e-08	0.0233552	TYROBP	TYRO protein tyrosine kinase binding protein
211582_x_at	4.88e-08	0.00493911	LST1	leukocyte specific transcript 1
229659_s_at	5.66e-08	0.0177049	PIGR	polymeric immunoglobulin receptor
226147_s_at	6.63e-08	0.0202567	PIGR	polymeric immunoglobulin receptor
204259_at	6.98e-08	0.0307274	MMP7	matrix metalloproteinase 7 (matrilysin, uterine)
208812_x_at	7.36e-08	0.00893365	HLA-C	major histocompatibility complex, class I, C
211529_x_at	8.91e-08	0.00999704	HLA-G	HLA-G histocompatibility antigen, class I, G
225353_s_at	9.47e-08	0.0212828	C1QG	complement component 1, q subcomponent, gamma polypeptide
211991_s_at	1.08e-07	0.0168261	HLA-DPA1	major histocompatibility complex, class II, DP alpha 1
201721_s_at	1.35e-07	0.0193669	LAPTM5	Lysosomal-associated multispanning membrane protein-5
201743_at	1.61e-07	0.0186927	CD14	CD14 antigen
214181_x_at	1.69e-07	0.00749592	LST1	leukocyte specific transcript 1
204932_at	2.22e-07	0.0156697	TNFRSF11B	tumor necrosis factor receptor superfamily, member 11b (osteoprotegerin)
209140_x_at	2.74e-07	0.00966946	HLA-B	major histocompatibility complex, class I, B
217988_at	3.12e-07	-0.00599495	HEI10	enhancer of invasion 10
208747_s_at	3.67e-07	0.0195244	C1S	complement component 1, s subcomponent
226723_at	3.85e-07	0.00558256	ERMAP	erythroblast membrane-associated protein
211656_x_at	4e-07	0.0154531	HLA-DQB1	major histocompatibility complex, class II, DQ beta 1
203104_at	4.07e-07	0.00791569	CSF1R	colony stimulating factor 1 receptor, formerly McDonough feline sarcoma viral (v-fms) oncogene homolog
204670_x_at	4.93e-07	0.0130241	HLA-DRB3	major histocompatibility complex, class II, DR beta 3
217181_at	5.53e-07	0.00434348	---	---
211799_x_at	5.75e-07	0.0115273	HLA-C	major histocompatibility complex, class I, C
224927_at	5.88e-07	0.00784849	KIAA1949	KIAA1949 protein
225725_at	5.92e-07	0.00970735	---	Homo sapiens, clone IMAGE:5261213, mRNA
221739_at	6.23e-07	0.00494502	IL27w	interleukin 27 working designation
216526_x_at	6.33e-07	0.00823841	HLA-C	major histocompatibility complex, class I, C
203066_at	6.79e-07	0.00665252	GALNAC4S-6ST	B cell RAG associated protein
202910_s_at	6.81e-07	0.00698215	CD97	CD97 antigen
210629_x_at	7.17e-07	0.00452654	LST1	leukocyte specific transcript 1
236539_at	7.24e-07	0.0194871	PTPN22	protein tyrosine phosphatase, non-receptor type 22 (lymphoid)
217478_s_at	7.8e-07	0.0110371	HLA-DMA	major histocompatibility complex, class II, DM alpha
211528_x_at	7.81e-07	0.00859693	HLA-G	HLA-G histocompatibility antigen, class I, G
214022_s_at	8.06e-07	0.0118953	PTS	6-pyruvoyltetrahydropterin synthase
225373_at	8.51e-07	0.00930312	PP2135	PP2135 protein
218232_at	9.3e-07	0.0225681	C1QA	complement component 1, q subcomponent, alpha polypeptide
227628_at	9.38e-07	0.00846599	ARHGEF1	Rho guanine nucleotide exchange factor (GEF) 1
215633_x_at	9.64e-07	0.00541786	LST1	leukocyte specific transcript 1
227125_at	1.1e-06	0.00695032	---	ESTs, Weakly similar to hypothetical protein FLJ20489 [Homo sapiens] [H.sapiens]
209823_x_at	1.13e-06	0.0152081	HLA-DQB1	major histocompatibility complex, class II, DQ beta 1
212646_at	1.18e-06	0.00953447	KIAA0084	KIAA0084 protein
213308_at	1.29e-06	-0.00691062	SHANK2	SH3 and multiple ankyrin repeat domains 2
238935_at	1.31e-06	0.008407	RPS27L	ribosomal protein S27-like
202803_s_at	1.32e-06	0.0154322	ITGB2	integrin, beta 2 (antigen CD18 (p95), lymphocyte function-associated antigen 1; macrophage antigen 1 (mac-1) beta subunit)
205898_at	1.4e-06	0.00939714	CX3CR1	chemokine (C-X3-C motif) receptor 1
202953_at	1.44e-06	0.0222008	C1QB	complement component 1, q subcomponent, beta polypeptide
210514_x_at	1.48e-06	0.00996882	HLA-G	HLA-G histocompatibility antigen, class I, G
212873_at	1.51e-06	0.00861031	HA-1	minor histocompatibility antigen HA-1
229041_s_at	1.55e-06	0.00884287	---	Homo sapiens, clone IMAGE:4766144, mRNA
209574_s_at	1.64e-06	0.00536831	C18orf1	chromosome 18 open reading frame 1
219204_s_at	1.64e-06	-0.00491506	SRR	serine racemase
223164_at	1.67e-06	0.00682872	MGC4607	hypothetical protein MGC4607
223640_at	1.77e-06	0.00633625	PIK3AP	phosphoinositide-3-kinase adaptor protein
225185_at	1.77e-06	0.00397696	MRAS	muscle RAS oncogene homolog
205098_at	1.92e-06	0.00439003	CCR1	chemokine (C-C motif) receptor 1
209312_x_at	2e-06	0.0127742	HLA-DRB1	major histocompatibility complex, class II, DR beta 1
224701_at	2.01e-06	0.00745981	KIAA1268	KIAA1268 protein
217022_s_at	2.1e-06	0.0472797	IGHM	immunoglobulin heavy constant mu
211654_x_at	2.12e-06	0.0147292	HLA-DQB1	major histocompatibility complex, class II, DQ beta 1
200953_s_at	2.19e-06	0.0133925	CCND2	cyclin D2
217456_x_at	2.44e-06	0.00931099	HLA-E	major histocompatibility complex, class I, E
219593_at	2.55e-06	0.00412953	PHT2	peptide transporter 3
210427_x_at	2.59e-06	0.00881352	ANXA2	annexin A2
228367_at	2.7e-06	0.0118647	HAK	heart alpha-kinase
225929_s_at	2.79e-06	0.0120215	KIAA1554	KIAA1554 protein
206370_at	2.88e-06	0.00529663	PIK3CG	phosphoinositide-3-kinase, catalytic, gamma polypeptide
227266_s_at	2.89e-06	0.0108292	---	Homo sapiens, clone IMAGE:4692106, mRNA
202237_at	3.15e-06	0.0310491	NNMT	nicotinamide N-methyltransferase
217757_at	3.18e-06	0.00843952	A2M	alpha-2-macroglobulin
205582_s_at	3.19e-06	0.00771623	GGTLA1	gamma-glutamyltransferase-like activity 1
217362_x_at	3.52e-06	0.0120595	HLA-DRB6	major histocompatibility complex, class II, DR beta 6 (pseudogene)
204073_s_at	3.72e-06	0.00739196	C11orf9	chromosome 11 open reading frame 9
229640_x_at	3.76e-06	0.00809723	---	ESTs, Moderately similar to hypothetical protein, MGC:7199 [Mus musculus] [M.musculus]
203729_at	3.78e-06	0.0095087	EMP3	epithelial membrane protein 3
203005_at	3.79e-06	0.00666495	LTBR	lymphotoxin beta receptor (TNFR superfamily, member 3)
209040_s_at	3.81e-06	0.00780229	PSMB8	proteasome (prosome, macropain) subunit, beta type, 8 (large multifunctional protease 7)
225520_at	3.99e-06	0.00981015	DKFZP586G1517	DKFZP586G1517 protein
217733_s_at	4.04e-06	0.0115069	TMSB10	thymosin, beta 10
223454_at	4.43e-06	0.0072842	CXCL16	chemokine (C-X-C motif) ligand 16
203548_s_at	4.47e-06	-0.0141005	LPL	lipoprotein lipase
218960_at	4.55e-06	0.00974375	TMPRSS4	transmembrane protease, serine 4
202307_s_at	4.73e-06	0.0091592	PSMB8	proteasome (prosome, macropain) subunit, beta type, 8 (large multifunctional protease 7)
201720_s_at	4.82e-06	0.0078836	LAPTM5	Lysosomal-associated multispanning membrane protein-5
221698_s_at	4.85e-06	0.0118987	CLECSF12	C-type (calcium dependent, carbohydrate-recognition domain) lectin, superfamily member 12
213932_x_at	4.87e-06	0.00692641	HLA-A	major histocompatibility complex, class I, A
230966_at	5.11e-06	0.00666238	IL4I1	interleukin 4 induced 1
212464_s_at	5.32e-06	0.011149	FN1	fibronectin 1
214770_at	5.39e-06	0.0100956	MSR1	macrophage scavenger receptor 1
201189_s_at	5.66e-06	0.00944387	ITPR3	inositol 1,4,5-triphosphate receptor, type 3
201141_at	5.69e-06	0.0111339	GPNMB	glycoprotein (transmembrane) nmb
203485_at	5.72e-06	0.0101717	RTN1	reticulon 1
219359_at	5.88e-06	0.0140206	FLJ22635	hypothetical protein FLJ22635
216442_x_at	5.91e-06	0.0113416	FN1	fibronectin 1
209083_at	5.94e-06	0.00857578	CORO1A	coronin, actin binding protein, 1A
222409_at	6.19e-06	0.00918354	CORO1C	coronin, actin binding protein, 1C
212229_s_at	6.37e-06	-0.00810603	FBXO21	F-box only protein 21
214459_x_at	6.37e-06	0.0070955	HUMMHCW1A	Cw1 antigen
202957_at	6.37e-06	0.0146304	HCLS1	hematopoietic cell-specific Lyn substrate 1
204279_at	6.41e-06	0.0125169	PSMB9	proteasome (prosome, macropain) subunit, beta type, 9 (large multifunctional protease 2)
218170_at	6.47e-06	-0.00781734	CGI-111	CGI-111 protein
213975_s_at	6.51e-06	0.0266939	LYZ	lysozyme (renal amyloidosis)
204328_at	6.59e-06	0.0052963	EVIN1	expressed in activated T/LAK lymphocytes
201007_at	6.79e-06	-0.00617836	HADHB	hydroxyacyl-Coenzyme A dehydrogenase/3-ketoacyl-Coenzyme A thiolase/enoyl-Coenzyme A hydratase (trifunctional protein), beta subunit
226474_at	6.84e-06	0.00901822	FLJ21709	hypothetical protein FLJ21709
213293_s_at	6.87e-06	0.0116905	TRIM22	tripartite motif-containing 22
203892_at	6.92e-06	0.0189068	WFDC2	WAP four-disulfide core domain 2
204057_at	6.93e-06	0.00729578	ICSBP1	interferon consensus sequence binding protein 1
221840_at	7.03e-06	0.00618346	PTPRE	protein tyrosine phosphatase, receptor type, E
207339_s_at	7.1e-06	0.0113048	LTB	lymphotoxin beta (TNF superfamily, member 3)
204470_at	7.18e-06	0.0195444	CXCL1	chemokine (C-X-C motif) ligand 1 (melanoma growth stimulating activity, alpha)
203549_s_at	7.2e-06	-0.0150241	LPL	lipoprotein lipase
202018_s_at	7.24e-06	0.027452	LTF	lactotransferrin
226841_at	7.28e-06	0.0117383	LOC219972	hypothetical protein LOC219972
215313_x_at	7.42e-06	0.00671184	HLA-A	major histocompatibility complex, class I, A
230000_at	7.54e-06	0.011523	KIAA1554	KIAA1554 protein
213503_x_at	7.63e-06	0.00846241	ANXA2	annexin A2
210986_s_at	7.64e-06	0.0100227	TPM1	tropomyosin 1 (alpha)
202659_at	7.66e-06	0.0114623	PSMB10	proteasome (prosome, macropain) subunit, beta type, 10
202145_at	7.83e-06	0.00696128	LY6E	lymphocyte antigen 6 complex, locus E
202242_at	8.03e-06	-0.00804773	TM4SF2	transmembrane 4 superfamily member 2
214084_x_at	8.24e-06	0.00627178	---	---
209166_s_at	8.32e-06	0.00817734	MAN2B1	mannosidase, alpha, class 2B, member 1
203416_at	8.36e-06	0.00533221	CD53	CD53 antigen
203476_at	8.42e-06	0.0102971	TPBG	trophoblast glycoprotein
209340_at	8.43e-06	-0.0101098	UAP1	UDP-N-acteylglucosamine pyrophosphorylase 1
204150_at	8.5e-06	0.0136541	STAB1	stabilin 1
206254_at	8.54e-06	-0.0281497	EGF	epidermal growth factor (beta-urogastrone)
215193_x_at	8.94e-06	0.0135116	HLA-DRB3	major histocompatibility complex, class II, DR beta 3
208848_at	8.95e-06	-0.00857492	ADH5	alcohol dehydrogenase 5 (class III), chi polypeptide
204933_s_at	9.17e-06	0.0129124	TNFRSF11B	tumor necrosis factor receptor superfamily, member 11b (osteoprotegerin)
226748_at	9.3e-06	0.00575802	MGC35274	hypothetical protein MGC35274
218638_s_at	9.65e-06	0.0113121	SPON2	spondin 2, extracellular matrix protein
204912_at	9.77e-06	0.00843714	IL10RA	interleukin 10 receptor, alpha
210704_at	9.99e-06	0.00378037	FEZ2	fasciculation and elongation protein zeta 2 (zygin II)
203774_at	1.02e-05	-0.00699003	MTR	5-methyltetrahydrofolate-homocysteine methyltransferase
228315_at	1.05e-05	0.00587901	---	Homo sapiens cDNA FLJ31683 fis, clone NT2RI2005353.
230276_at	1.07e-05	0.0133737	DKFZP566A1524	hypothetical protein DKFZp566A1524
214677_x_at	1.1e-05	0.0419504	IGLJ3	immunoglobulin lambda joining 3
224733_at	1.11e-05	0.00757858	CKLFSF3	chemokine-like factor super family 3
225415_at	1.12e-05	0.0104121	LOC151636	rhysin 2
204304_s_at	1.12e-05	0.0154535	PROML1	prominin-like 1 (mouse)
210495_x_at	1.13e-05	0.0106098	FN1	fibronectin 1
216041_x_at	1.14e-05	0.00539179	GRN	granulin
205371_s_at	1.16e-05	-0.00810359	DBT	dihydrolipoamide branched chain transacylase (E2 component of branched chain keto acid dehydrogenase complex; maple syrup urine disease)
202649_x_at	1.22e-05	0.00706243	RPS19	ribosomal protein S19
201954_at	1.22e-05	0.00694187	ARPC1B	actin related protein 2/3 complex, subunit 1B, 41kDa
221221_s_at	1.23e-05	-0.0087484	KLHL3	kelch-like 3 (Drosophila)
78495_at	1.26e-05	0.00294107	DKFZp762P2111	hypothetical protein DKFZp762P2111
218223_s_at	1.26e-05	0.00929946	CKIP-1	CK2 interacting protein 1; HQ0024c protein
203219_s_at	1.26e-05	0.00462936	APRT	adenine phosphoribosyltransferase
228376_at	1.28e-05	0.00902906	a1/3GTP	alpha-1,3-galactosyltransferase pseudogene
220371_s_at	1.29e-05	0.00334229	CIP1	cation-chloride cotransporter-interacting protein
206682_at	1.29e-05	0.00791607	HML2	macrophage lectin 2 (calcium dependent)
228055_at	1.3e-05	0.00655841	NAP1L	napsin B pseudogene
214774_x_at	1.32e-05	-0.0107453	TNRC9	trinucleotide repeat containing 9
202800_at	1.34e-05	0.00521915	SLC1A3	solute carrier family 1 (glial high affinity glutamate transporter), member 3
213915_at	1.4e-05	0.00450064	NKG7	natural killer cell group 7 sequence
201134_x_at	1.41e-05	-0.00377965	COX7C	cytochrome c oxidase subunit VIIc
231956_at	1.41e-05	0.00909594	KIAA1618	KIAA1618 protein
209966_x_at	1.44e-05	-0.00987359	ESRRG	estrogen-related receptor gamma
213733_at	1.46e-05	0.00644316	MYO1F	myosin IF
212998_x_at	1.47e-05	0.0185288	HLA-DQB1	major histocompatibility complex, class II, DQ beta 1
235964_x_at	1.47e-05	0.0165459	SAMHD1	SAM domain and HD domain 1
219386_s_at	1.49e-05	0.0102008	BLAME	B lymphocyte activator macrophage expressed
210988_s_at	1.49e-05	0.00411837	HTCD37	TcD37 homolog
203798_s_at	1.49e-05	0.0131092	VSNL1	visinin-like 1
206039_at	1.51e-05	0.00394545	RAB33A	RAB33A, member RAS oncogene family
207571_x_at	1.51e-05	0.00822161	ICB-1	basement membrane-induced gene
204319_s_at	1.54e-05	0.00684998	RGS10	regulator of G-protein signalling 10
201426_s_at	1.61e-05	0.00973063	VIM	vimentin
200678_x_at	1.63e-05	0.00580986	GRN	granulin
205498_at	1.63e-05	-0.00902598	GHR	growth hormone receptor
208554_at	1.71e-05	0.00574198	POU4F3	POU domain, class 4, transcription factor 3
201331_s_at	1.74e-05	0.00535931	STAT6	signal transducer and activator of transcription 6, interleukin-4 induced
210785_s_at	1.76e-05	0.00884262	ICB-1	basement membrane-induced gene
207992_s_at	1.77e-05	-0.00391086	AMPD3	adenosine monophosphate deaminase (isoform E)
215379_x_at	1.79e-05	0.0413495	IGL@	immunoglobulin lambda locus
208636_at	1.8e-05	0.012411	ACTN1	actinin, alpha 1
215121_x_at	1.82e-05	0.0401228	IGLJ3	immunoglobulin lambda joining 3
212592_at	1.82e-05	0.0397172	IGJ	immunoglobulin J polypeptide, linker protein for immunoglobulin alpha and mu polypeptides
201288_at	1.83e-05	0.00987859	ARHGDIB	Rho GDP dissociation inhibitor (GDI) beta
205180_s_at	1.87e-05	0.00423054	ADAM8	a disintegrin and metalloproteinase domain 8
214836_x_at	1.91e-05	0.0399394	IGKC	immunoglobulin kappa constant
224795_x_at	1.91e-05	0.0327683	IGKC	immunoglobulin kappa constant
213414_s_at	1.92e-05	0.0074231	---	EST, Weakly similar to I52692 ribosomal protein S19, cytosolic - human [H.sapiens]
202510_s_at	1.94e-05	0.0107657	TNFAIP2	tumor necrosis factor, alpha-induced protein 2
200708_at	1.95e-05	-0.00390479	GOT2	glutamic-oxaloacetic transaminase 2, mitochondrial (aspartate aminotransferase 2)
209138_x_at	1.95e-05	0.0390612	IGLJ3	immunoglobulin lambda joining 3
224925_at	1.97e-05	0.00557316	PRex1	KIAA1415 protein
230865_at	2e-05	0.0111847	FLJ25534	hypothetical protein FLJ25534
211241_at	2.01e-05	0.00451809	ANXA2P3	annexin A2 pseudogene 3
223343_at	2.01e-05	0.017602	MS4A7	membrane-spanning 4-domains, subfamily A, member 7
230550_at	2.05e-05	0.0121824	MS4A6A	membrane-spanning 4-domains, subfamily A, member 6A
228531_at	2.1e-05	0.00933874	FLJ20073	hypothetical protein FLJ20073
215108_x_at	2.11e-05	-0.0109728	TNRC9	trinucleotide repeat containing 9
222986_s_at	2.11e-05	0.00611417	SCOTIN	scotin
228937_at	2.12e-05	0.00481305	---	ESTs
201011_at	2.12e-05	0.00601942	RPN1	ribophorin I
224412_s_at	2.15e-05	-0.0111926	TRPM6	transient receptor potential cation channel, subfamily M, member 6
212288_at	2.2e-05	0.00557281	FNBP1	formin binding protein 1
223204_at	2.26e-05	0.0131409	DKFZp434L142	hypothetical protein DKFZp434L142
202238_s_at	2.28e-05	0.0180927	NNMT	nicotinamide N-methyltransferase
214321_at	2.29e-05	0.0121356	NOV	nephroblastoma overexpressed gene
224916_at	2.31e-05	0.0052541	---	Homo sapiens cDNA FLJ38577 fis, clone HCHON2007650.
236170_x_at	2.31e-05	-0.00526236	---	Homo sapiens cDNA FLJ31032 fis, clone HSYRA1000152.
211719_x_at	2.34e-05	0.0105481	FN1	fibronectin 1
224910_at	2.35e-05	0.00388597	---	ESTs, Weakly similar to hypothetical protein FLJ20489 [Homo sapiens] [H.sapiens]
201700_at	2.37e-05	0.00438303	CCND3	cyclin D3
211992_at	2.38e-05	-0.00824919	PRKWNK1	protein kinase, lysine deficient 1
229295_at	2.38e-05	0.00329991	---	Homo sapiens cDNA FLJ32274 fis, clone PROST2000036.
203570_at	2.48e-05	0.00802377	LOXL1	lysyl oxidase-like 1
224724_at	2.58e-05	0.0112994	SULF2	similar to glucosamine-6-sulfatases
201587_s_at	2.59e-05	0.00746911	IRAK1	interleukin-1 receptor-associated kinase 1
214574_x_at	2.6e-05	0.00366904	LST1	leukocyte specific transcript 1
203828_s_at	2.7e-05	0.0170942	NK4	natural killer cell transcript 4
244498_x_at	2.71e-05	0.00848599	MFAP1	microfibrillar-associated protein 1
232510_s_at	2.77e-05	0.00477245	DPP3	dipeptidylpeptidase 3
211457_at	2.79e-05	-0.00488059	GABARAPL3	GABA(A) receptors associated protein like 3
221565_s_at	2.88e-05	0.00336048	LOC51063	hypothetical protein LOC51063
202310_s_at	2.89e-05	0.0198101	COL1A1	collagen, type I, alpha 1
205773_at	2.93e-05	-0.010737	KIAA0940	KIAA0940 protein
205713_s_at	2.94e-05	0.00851578	COMP	cartilage oligomeric matrix protein (pseudoachondroplasia, epiphyseal dysplasia 1, multiple)
205668_at	2.97e-05	0.0111241	LY75	lymphocyte antigen 75
208700_s_at	2.98e-05	0.00949702	TKT	transketolase (Wernicke-Korsakoff syndrome)
207740_s_at	3.01e-05	0.00387727	NUP62	nucleoporin 62kDa
218530_at	3.16e-05	0.00322225	FHOD1	formin homology 2 domain containing 1
225701_at	3.16e-05	0.00636791	AKNA	AT-hook transcription factor AKNA
209869_at	3.3e-05	0.00562	ADRA2A	adrenergic, alpha-2A-, receptor
213160_at	3.33e-05	0.00507916	DOCK2	dedicator of cyto-kinesis 2
207827_x_at	3.33e-05	0.00543876	SNCA	synuclein, alpha (non A4 component of amyloid precursor)
203882_at	3.36e-05	0.00731258	ISGF3G	interferon-stimulated transcription factor 3, gamma 48kDa
204655_at	3.41e-05	0.0122183	CCL5	chemokine (C-C motif) ligand 5
216623_x_at	3.42e-05	-0.0101804	TNRC9	trinucleotide repeat containing 9
205789_at	3.52e-05	0.00543914	CD1D	CD1D antigen, d polypeptide
201601_x_at	3.52e-05	0.00899387	PTS	6-pyruvoyltetrahydropterin synthase
204781_s_at	3.63e-05	0.00837967	TNFRSF6	tumor necrosis factor receptor superfamily, member 6
204793_at	3.65e-05	-0.00555133	KIAA0443	KIAA0443 gene product
210933_s_at	3.66e-05	0.0103085	---	Unknown (protein for MGC:4655) [Homo sapiens], mRNA sequence
238692_at	3.68e-05	-0.00594832	FLJ33957	hypothetical protein FLJ33957
207191_s_at	3.7e-05	0.0079009	ISLR	immunoglobulin superfamily containing leucine-rich repeat
212314_at	3.74e-05	0.00920458	KIAA0746	KIAA0746 protein
226771_at	3.77e-05	0.00881644	ATP8B2	ATPase, Class I, type 8B, member 2
212587_s_at	3.8e-05	0.0208188	PTPRC	protein tyrosine phosphatase, receptor type, C
207709_at	3.84e-05	-0.00388533	PRKAA2	protein kinase, AMP-activated, alpha 2 catalytic subunit
241302_at	3.88e-05	0.00527667	---	ESTs
217127_at	3.89e-05	-0.00774945	CTH	cystathionase (cystathionine gamma-lyase)
200951_s_at	3.9e-05	0.00360904	CCND2	cyclin D2
223553_s_at	3.9e-05	0.00414806	FLJ22570	hypothetical protein FLJ22570
230036_at	3.96e-05	0.0038791	FLJ39885	hypothetical protein FLJ39885
204446_s_at	4e-05	0.0193992	ALOX5	arachidonate 5-lipoxygenase
218007_s_at	4.02e-05	0.0058791	RPS27L	ribosomal protein S27-like
219288_at	4.07e-05	-0.00444181	HT021	HT021
234985_at	4.07e-05	0.00579365	LOC143458	hypothetical protein LOC143458
211994_at	4.15e-05	-0.00512481	---	Homo sapiens, clone IMAGE:5264735, mRNA, mRNA sequence
227295_at	4.17e-05	0.00993057	---	Homo sapiens, Similar to RIKEN cDNA 1700023M03 gene, clone IMAGE:4772912, mRNA
212419_at	4.19e-05	0.00742857	FLJ90798	hypothetical protein FLJ90798
226818_at	4.36e-05	0.00810912	LOC219972	hypothetical protein LOC219972
202357_s_at	4.42e-05	0.0171665	BF	B-factor, properdin
224929_at	4.44e-05	0.004614	---	Homo sapiens cDNA FLJ38577 fis, clone HCHON2007650.
209374_s_at	4.5e-05	0.0199631	IGHM	immunoglobulin heavy constant mu
219332_at	4.53e-05	0.00839655	FLJ23471	hypothetical protein FLJ23471
202804_at	4.53e-05	0.00346023	ABCC1	ATP-binding cassette, sub-family C (CFTR/MRP), member 1
205044_at	4.55e-05	0.0117006	GABRP	gamma-aminobutyric acid (GABA) A receptor, pi
213993_at	4.56e-05	0.00643116	SPON1	spondin 1, (f-spondin) extracellular matrix protein
235421_at	4.58e-05	0.00960747	---	Homo sapiens, clone IMAGE:4689481, mRNA
213566_at	4.59e-05	0.00751982	RNASE6	ribonuclease, RNase A family, k6
223484_at	4.68e-05	0.00618818	NMES1	normal mucosa of esophagus specific 1
219768_at	4.78e-05	0.00517116	FLJ22418	hypothetical protein FLJ22418
205047_s_at	4.93e-05	0.00695139	ASNS	asparagine synthetase
212588_at	5.02e-05	0.020413	PTPRC	protein tyrosine phosphatase, receptor type, C
209250_at	5.06e-05	0.00741486	DEGS	degenerative spermatocyte homolog, lipid desaturase (Drosophila)
238034_at	5.07e-05	0.00679199	CANX	calnexin
204438_at	5.09e-05	0.013696	MRC1	mannose receptor, C type 1
235529_x_at	5.25e-05	0.0139472	SAMHD1	SAM domain and HD domain 1
201590_x_at	5.28e-05	0.00779283	ANXA2	annexin A2
211284_s_at	5.41e-05	0.00491554	GRN	granulin
218130_at	5.47e-05	0.00688064	MGC4368	hypothetical protein MGC4368
200780_x_at	5.58e-05	-0.00483009	GNAS	GNAS complex locus
224531_at	5.59e-05	0.00565726	GPR61	G protein-coupled receptor 61
227752_at	5.61e-05	0.00564399	---	Homo sapiens cDNA FLJ90790 fis, clone THYRO1001529, weakly similar to SERINE PALMITOYLTRANSFERASE 2 (EC 2.3.1.50).
236037_at	5.63e-05	-0.00429835	LOC202451	hypothetical protein LOC202451
205477_s_at	5.69e-05	0.00367943	AMBP	alpha-1-microglobulin/bikunin precursor
224874_at	5.73e-05	0.00723627	MGC9850	hypothetical protein MGC9850
227726_at	5.76e-05	0.00574933	MGC2647	hypothetical zinc finger protein MGC2647
227307_at	5.83e-05	0.00541089	LOC90139	tetraspanin similiar to uroplakin 1
224791_at	5.92e-05	0.00719595	DDEF1	development and differentiation enhancing factor 1
202975_s_at	5.97e-05	-0.00743314	---	Homo sapiens cDNA FLJ25165 fis, clone CBR08421, mRNA sequence
201859_at	5.98e-05	0.0101391	PRG1	proteoglycan 1, secretory granule
206595_at	6.01e-05	0.0146964	CST6	cystatin E/M
221933_at	6.03e-05	0.00534655	KIAA1260	neuroligin
205857_at	6.17e-05	0.00470156	SLC18A2	solute carrier family 18 (vesicular monoamine), member 2
202837_at	6.2e-05	0.00250666	FLN29	FLN29 gene product
200025_s_at	6.21e-05	0.00682264	RPL27	ribosomal protein L27
231579_s_at	6.29e-05	0.0084781	TIMP2	tissue inhibitor of metalloproteinase 2
202626_s_at	6.36e-05	0.004385	LYN	v-yes-1 Yamaguchi sarcoma viral related oncogene homolog
204070_at	6.37e-05	0.0126572	RARRES3	retinoic acid receptor responder (tazarotene induced) 3
217436_x_at	6.37e-05	0.00684158	---	---
209913_x_at	6.4e-05	-0.00565841	KIAA0415	KIAA0415 gene product
221755_at	6.53e-05	0.00722915	DKFZp762C186	hypothetical protein DKFZp762C186
213245_at	6.53e-05	-0.00772062	---	Homo sapiens cDNA FLJ30781 fis, clone FEBRA2000874, mRNA sequence
208905_at	6.65e-05	-0.00695496	CYCS	cytochrome c, somatic
231779_at	6.68e-05	0.00432971	IRAK2	interleukin-1 receptor-associated kinase 2
224237_at	6.69e-05	-0.00892694	---	---
218772_x_at	7.04e-05	-0.0116959	FLJ10493	hypothetical protein FLJ10493
224252_s_at	7.11e-05	0.00497108	FXYD5	FXYD domain containing ion transport regulator 5
216834_at	7.22e-05	0.0260934	---	B cell activation gene [Homo sapiens], mRNA sequence
226743_at	7.32e-05	0.00402091	FLJ34922	hypothetical protein FLJ34922
218543_s_at	7.38e-05	0.00680931	FLJ22693	hypothetical protein FLJ22693
228858_at	7.38e-05	-0.0047246	PABPN1	poly(A) binding protein, nuclear 1
226603_at	7.42e-05	0.00566494	FLJ39885	hypothetical protein FLJ39885
242775_at	7.47e-05	-0.00877959	---	ESTs, Weakly similar to hypothetical protein FLJ20489 [Homo sapiens] [H.sapiens]
215946_x_at	7.49e-05	0.0343654	LOC91316	similar to bK246H3.1 (immunoglobulin lambda-like polypeptide 1, pre-B-cell specific)
200715_x_at	7.52e-05	0.00481216	RPL13A	ribosomal protein L13a
210776_x_at	7.7e-05	0.00335244	---	E12 protein, mRNA sequence
215020_at	7.71e-05	0.00325664	NRXN3	neurexin 3
206896_s_at	7.71e-05	-0.00449595	GNG7	guanine nucleotide binding protein (G protein), gamma 7
244567_at	7.75e-05	0.0294067	---	ESTs
234987_at	7.77e-05	0.0174732	SAMHD1	SAM domain and HD domain 1
205269_at	7.86e-05	0.0149641	LCP2	lymphocyte cytosolic protein 2 (SH2 domain containing leukocyte protein of 76kDa)
210982_s_at	7.9e-05	0.0128132	HLA-DRA	major histocompatibility complex, class II, DR alpha
206860_s_at	7.92e-05	0.00570722	FLJ20323	hypothetical protein FLJ20323
226621_at	7.94e-05	0.0137143	FGG	fibrinogen, gamma polypeptide
203878_s_at	7.96e-05	0.0038203	MMP11	matrix metalloproteinase 11 (stromelysin 3)
200725_x_at	8.04e-05	0.00430865	RPL10	ribosomal protein L10
230383_x_at	8.12e-05	0.00557755	---	ESTs
213603_s_at	8.15e-05	0.00787575	HSPC022	HSPC022 protein
208869_s_at	8.18e-05	-0.00969994	GABARAPL1	GABA(A) receptor-associated protein like 1
212013_at	8.19e-05	0.00559053	D2S448	Melanoma associated gene
214768_x_at	8.2e-05	0.0338055	IGKC	immunoglobulin kappa constant
221900_at	8.24e-05	0.00331911	COL8A2	collagen, type VIII, alpha 2
224358_s_at	8.39e-05	0.00796172	MS4A7	membrane-spanning 4-domains, subfamily A, member 7
226905_at	8.4e-05	0.00663864	---	Homo sapiens, clone IMAGE:4564684, mRNA, partial cds
221651_x_at	8.42e-05	0.0319256	IGKC	immunoglobulin kappa constant
210653_s_at	8.45e-05	-0.00374922	BCKDHB	branched chain keto acid dehydrogenase E1, beta polypeptide (maple syrup urine disease)
224885_s_at	8.54e-05	0.006158	KCP2	keratinocytes associated protein 2
202960_s_at	8.54e-05	-0.004736	MUT	methylmalonyl Coenzyme A mutase
229390_at	8.67e-05	0.0125307	---	Homo sapiens full length insert cDNA clone ZA84A12
204858_s_at	8.71e-05	0.00569306	ECGF1	endothelial cell growth factor 1 (platelet-derived)
220751_s_at	8.79e-05	-0.00495015	C5orf4	chromosome 5 open reading frame 4
216173_at	8.79e-05	-0.00680091	---	Homo sapiens cDNA: FLJ21707 fis, clone COL09953, mRNA sequence
221799_at	8.87e-05	0.00323994	CSGlcA-T	KIAA1402 protein
213307_at	8.91e-05	-0.00356397	SHANK2	SH3 and multiple ankyrin repeat domains 2
221671_x_at	8.94e-05	0.031674	IGKC	immunoglobulin kappa constant
209118_s_at	8.99e-05	0.0111573	TUBA3	tubulin, alpha 3
230381_at	9.07e-05	0.00425101	---	ESTs, Moderately similar to S29539 ribosomal protein L13a, cytosolic - human [H.sapiens]
204220_at	9.07e-05	0.00620741	GMFG	glia maturation factor, gamma
206085_s_at	9.14e-05	-0.00696901	CTH	cystathionase (cystathionine gamma-lyase)
204774_at	9.2e-05	0.00792384	EVI2A	ecotropic viral integration site 2A
228750_at	9.27e-05	0.0125082	---	ESTs
208868_s_at	9.38e-05	-0.008106	GABARAPL1	GABA(A) receptor-associated protein like 1
219471_at	9.43e-05	0.00257319	FLJ21562	hypothetical protein FLJ21562
201744_s_at	9.47e-05	0.0161871	LUM	lumican
211795_s_at	9.56e-05	0.010054	FYB	FYN binding protein (FYB-120/130)
211430_s_at	9.75e-05	0.0392059	IGHG3	immunoglobulin heavy constant gamma 3 (G3m marker)
220728_at	9.77e-05	-0.00903138	---	Unnamed protein product [Homo sapiens], mRNA sequence
230326_s_at	9.78e-05	0.00421487	HSPC138	hypothetical protein HSPC138
205278_at	9.79e-05	-0.0103088	GAD1	glutamate decarboxylase 1 (brain, 67kDa)
209879_at	9.87e-05	0.00512279	SELPLG	selectin P ligand
212680_x_at	9.88e-05	0.00534058	PPP1R14B	protein phosphatase 1, regulatory (inhibitor) subunit 14B
243514_at	9.95e-05	-0.0072712	WDFY2	WD40 and FYVE domain containing 2
212599_at	0.0001	-0.00728616	AUTS2	autism susceptibility candidate 2
226769_at	0.0001	0.00647521	---	Homo sapiens, similar to RIKEN cDNA 1110018M03, clone MGC:24932 IMAGE:4938507, mRNA, complete cds
211689_s_at	0.000101	-0.00999251	TMPRSS2	transmembrane protease, serine 2
211546_x_at	0.000101	0.00513345	SNCA	synuclein, alpha (non A4 component of amyloid precursor)
211509_s_at	0.000102	-0.00459467	RTN4	reticulon 4
211796_s_at	0.000102	0.0128962	TRB@	T cell receptor beta locus
203868_s_at	0.000102	0.0178813	VCAM1	vascular cell adhesion molecule 1
207057_at	0.000103	-0.0127971	SLC16A7	solute carrier family 16 (monocarboxylic acid transporters), member 7
233510_s_at	0.000104	0.00423385	PARVG	parvin, gamma
217513_at	0.000104	0.00408566	---	Unknown (protein for MGC:11120) [Homo sapiens], mRNA sequence
244061_at	0.000105	0.00796715	---	ESTs
240519_at	0.000106	-0.00531572	---	ESTs
207507_s_at	0.000108	-0.00505967	ATP5G3	ATP synthase, H+ transporting, mitochondrial F0 complex, subunit c (subunit 9) isoform 3
44790_s_at	0.000108	0.00826525	FLJ21562	hypothetical protein FLJ21562
215578_at	0.000108	-0.00592681	---	Homo sapiens cDNA FLJ11662 fis, clone HEMBA1004629, mRNA sequence
216589_at	0.000108	0.00908297	---	---
235527_at	0.000109	0.00757092	LOC284214	hypothetical protein LOC284214
218025_s_at	0.000109	-0.00801556	PECI	peroxisomal D3,D2-enoyl-CoA isomerase
60471_at	0.00011	0.00279912	RIN3	Ras and Rab interactor 3
227006_at	0.00011	0.0118609	PPP1R14A	protein phosphatase 1, regulatory (inhibitor) subunit 14A
219574_at	0.000111	0.00503802	FLJ20668	hypothetical protein FLJ20668
207813_s_at	0.000111	0.00479231	FDXR	ferredoxin reductase
205890_s_at	0.000112	0.0117345	UBD	ubiquitin D
242521_at	0.000112	0.00493722	---	ESTs
235085_at	0.000113	0.00744828	DKFZp761P0423	hypothetical protein DKFZp761P0423
229101_at	0.000113	0.00375358	---	ESTs
211367_s_at	0.000115	0.00739922	CASP1	caspase 1, apoptosis-related cysteine protease (interleukin 1, beta, convertase)
222288_at	0.000115	0.00519611	---	ESTs, Weakly similar to hypothetical protein FLJ20489 [Homo sapiens] [H.sapiens]
211121_s_at	0.000116	0.00375963	DOK1	docking protein 1, 62kDa (downstream of tyrosine kinase 1)
201645_at	0.000117	0.0135893	TNC	tenascin C (hexabrachion)
226605_at	0.000117	0.00460819	MGC4618	hypothetical protein MGC4618
213564_x_at	0.000118	-0.00491831	LDHB	lactate dehydrogenase B
205681_at	0.000118	0.0052756	BCL2A1	BCL2-related protein A1
204198_s_at	0.000118	0.00577722	RUNX3	runt-related transcription factor 3
212073_at	0.000118	-0.00409287	---	NF-E2-related factor 2 [Homo sapiens], mRNA sequence
201506_at	0.000118	0.0117939	TGFBI	transforming growth factor, beta-induced, 68kDa
218024_at	0.000119	-0.008031	BRP44L	brain protein 44-like
203859_s_at	0.000119	-0.00533336	PALM	paralemmin
205547_s_at	0.000119	0.0144868	TAGLN	transgelin
201792_at	0.000121	0.0059738	AEBP1	AE binding protein 1
202988_s_at	0.000123	0.0265992	RGS1	regulator of G-protein signalling 1
203039_s_at	0.000125	-0.00523677	NDUFS1	NADH dehydrogenase (ubiquinone) Fe-S protein 1, 75kDa (NADH-coenzyme Q reductase)
204494_s_at	0.000125	0.00300512	DKFZP434H132	DKFZP434H132 protein
232231_at	0.000126	0.00870225	---	Homo sapiens mRNA; cDNA DKFZp761J1112 (from clone DKFZp761J1112)
212663_at	0.000127	0.0027281	KIAA0674	KIAA0674 protein
209539_at	0.000127	0.00401215	ARHGEF6	Rac/Cdc42 guanine nucleotide exchange factor (GEF) 6
202992_at	0.000127	0.00908059	C7	complement component 7
237162_at	0.000128	-0.00396631	---	ESTs
207610_s_at	0.000128	0.00386018	EMR2	egf-like module containing, mucin-like, hormone receptor-like sequence 2
209373_at	0.000129	0.00325833	BENE	BENE protein
214719_at	0.00013	0.00456436	---	Homo sapiens cDNA: FLJ23067 fis, clone LNG04993, mRNA sequence
226009_at	0.00013	0.00253088	DKFZP566F084	DKFZP566F084 protein
244602_at	0.000131	0.0057631	---	ESTs
219036_at	0.000131	-0.00405153	BITE	p10-binding protein
210915_x_at	0.000132	0.0118144	TRB@	T cell receptor beta locus
220704_at	0.000133	0.0109937	PRO0758	hypothetical protein PRO0758
208837_at	0.000133	0.00484096	P24B	integral type I protein
201797_s_at	0.000134	0.00441966	VARS2	valyl-tRNA synthetase 2
204589_at	0.000135	0.00574267	ARK5	KIAA0537 gene product
221731_x_at	0.000136	0.0218311	CSPG2	chondroitin sulfate proteoglycan 2 (versican)
204191_at	0.000136	0.0032098	IFNAR1	interferon (alpha, beta and omega) receptor 1
217497_at	0.000136	0.00822189	ECGF1	endothelial cell growth factor 1 (platelet-derived)
203939_at	0.000137	0.00549736	NT5E	5'-nucleotidase, ecto (CD73)
218081_at	0.000138	0.00435499	C20orf27	chromosome 20 open reading frame 27
236813_at	0.00014	-0.00426552	---	Homo sapiens, clone MGC:27390 IMAGE:4690584, mRNA, complete cds
230986_at	0.00014	0.00538296	---	Homo sapiens cDNA FLJ30065 fis, clone ADRGL2000328.
214669_x_at	0.000141	0.0317717	IGKC	immunoglobulin kappa constant
203542_s_at	0.000141	-0.00914597	BTEB1	basic transcription element binding protein 1
213994_s_at	0.000141	0.0135794	SPON1	spondin 1, (f-spondin) extracellular matrix protein
225045_at	0.000141	0.00522852	FLJ10392	hypothetical protein FLJ10392
201798_s_at	0.000142	0.00684352	FER1L3	fer-1-like 3, myoferlin (C. elegans)
228855_at	0.000144	-0.00624785	---	Homo sapiens cDNA: FLJ22816 fis, clone KAIA3155.
212796_s_at	0.000144	0.00421061	KIAA1055	KIAA1055 protein
31837_at	0.000145	0.00247516	BC002942	hypothetical protein BC002942
212231_at	0.000147	-0.00667603	FBXO21	F-box only protein 21
208829_at	0.000149	0.00776694	TAPBP	TAP binding protein (tapasin)
217028_at	0.000149	0.0225381	CXCR4	chemokine (C-X-C motif) receptor 4
207180_s_at	0.00015	0.00350915	HTATIP2	HIV-1 Tat interactive protein 2, 30kDa
202976_s_at	0.00015	-0.0074144	RHOBTB3	Rho-related BTB domain containing 3
212874_at	0.00015	0.0046764	APOE	apolipoprotein E
223280_x_at	0.000151	0.00755902	MS4A6A	membrane-spanning 4-domains, subfamily A, member 6A
222512_at	0.000154	0.00500108	NYREN18	NEDD8 ultimate buster-1
215829_at	0.000157	0.0051975	SHANK2	SH3 and multiple ankyrin repeat domains 2
213857_s_at	0.000157	0.00751058	CD47	CD47 antigen (Rh-related antigen, integrin-associated signal transducer)
205776_at	0.000158	-0.00559428	FMO5	flavin containing monooxygenase 5
204294_at	0.000158	-0.00355365	AMT	aminomethyltransferase (glycine cleavage system protein T)
210987_x_at	0.000161	0.00747765	TPM1	tropomyosin 1 (alpha)
212969_x_at	0.000161	0.00439416	FLJ35827	hypothetical protein FLJ35827
228754_at	0.000162	0.0104704	KIAA1719	KIAA1719 protein
212568_s_at	0.000163	-0.00509622	DLAT	dihydrolipoamide S-acetyltransferase (E2 component of pyruvate dehydrogenase complex)
225681_at	0.000163	0.0133382	CTHRC1	collagen triple helix repeat containing 1
204336_s_at	0.000165	0.00331812	RGS19	regulator of G-protein signalling 19
227019_at	0.000166	-0.00455186	---	Homo sapiens cDNA FLJ13137 fis, clone NT2RP3003150.
226017_at	0.000167	0.00456132	CKLFSF7	chemokine-like factor super family 7
204882_at	0.000169	0.00462128	KIAA0053	KIAA0053 gene product
217506_at	0.000169	-0.00635501	---	ESTs, Weakly similar to hypothetical protein FLJ20378 [Homo sapiens] [H.sapiens]
225798_at	0.00017	0.00334063	DKFZp761K2222	hypothetical protein DKFZp761K2222
207781_s_at	0.00017	-0.011048	ZNF6	zinc finger protein 6 (CMPX1)
221531_at	0.000171	-0.00355231	REC14	recombination protein REC14
222549_at	0.000176	0.0117938	CLDN1	claudin 1
216022_at	0.000176	-0.00785854	---	Homo sapiens mRNA; cDNA DKFZp564I153 (from clone DKFZp564I153), mRNA sequence
204232_at	0.000177	0.00684115	FCER1G	Fc fragment of IgE, high affinity I, receptor for; gamma polypeptide
221530_s_at	0.000177	0.00792595	BHLHB3	basic helix-loop-helix domain containing, class B, 3
208205_at	0.000178	0.00316962	PCDHA9	protocadherin alpha 9
203769_s_at	0.000178	0.00329959	STS	steroid sulfatase (microsomal), arylsulfatase C, isozyme S
208637_x_at	0.000179	0.00728597	ACTN1	actinin, alpha 1
218627_at	0.00018	0.00375284	FLJ11259	hypothetical protein FLJ11259
204367_at	0.00018	-0.00344927	SP2	Sp2 transcription factor
217118_s_at	0.000181	0.00412045	KIAA0930	KIAA0930 protein
217680_x_at	0.000182	-0.0087761	---	ESTs, Moderately similar to RL10_HUMAN 60S ribosomal protein L10 (QM protein) (Tumor suppressor QM) (Laminin receptor homolog) [H.sapiens]
218637_at	0.000183	-0.00488783	IMPACT	hypothetical protein IMPACT
223044_at	0.000184	0.00734227	SLC11A3	solute carrier family 11 (proton-coupled divalent metal ion transporters), member 3
232047_at	0.000186	-0.0029612	---	Homo sapiens cDNA FLJ20812 fis, clone ADSE01316.
201666_at	0.000187	0.0169277	TIMP1	tissue inhibitor of metalloproteinase 1 (erythroid potentiating activity, collagenase inhibitor)
230828_at	0.000187	-0.00454223	LOC196996	hypothetical protein LOC196996
208091_s_at	0.000187	0.00720416	DKFZP564K0822	hypothetical protein DKFZp564K0822
202180_s_at	0.000187	0.00860444	MVP	major vault protein
209708_at	0.000188	0.010426	DKFZP564G202	DKFZP564G202 protein
225602_at	0.000189	0.00611075	C9orf19	chromosome 9 open reading frame 19
235571_at	0.000189	0.00415993	---	ESTs, Weakly similar to hypothetical protein FLJ20489 [Homo sapiens] [H.sapiens]
209114_at	0.000191	0.0109982	TSPAN-1	tetraspan 1
200909_s_at	0.000191	0.00497918	RPLP2	ribosomal protein, large P2
222688_at	0.000193	0.00445764	PHCA	phytoceramidase, alkaline
213247_at	0.000193	0.00299716	FLJ90754	hypothetical protein FLJ90754
238327_at	0.000194	0.00580922	ECGF1	endothelial cell growth factor 1 (platelet-derived)
200904_at	0.000194	0.00674537	HLA-E	major histocompatibility complex, class I, E
214829_at	0.000195	-0.00912796	AASS	aminoadipate-semialdehyde synthase
213060_s_at	0.000196	0.0027575	CHI3L2	chitinase 3-like 2
209339_at	0.000196	-0.00332556	SIAH2	seven in absentia homolog 2 (Drosophila)
200916_at	0.000196	0.00741656	TAGLN2	transgelin 2
200634_at	0.000196	0.00642209	PFN1	profilin 1
211368_s_at	0.000197	0.00358919	CASP1	caspase 1, apoptosis-related cysteine protease (interleukin 1, beta, convertase)
244876_at	0.0002	0.00394708	---	ESTs
212114_at	0.0002	-0.00348294	---	Unknown (protein for MGC:17296) [Homo sapiens], mRNA sequence
229909_at	0.0002	-0.0037157	FLJ40362	hypothetical protein FLJ40362
218777_at	0.000204	0.00434887	FLJ22246	hypothetical protein FLJ22246
210538_s_at	0.000204	0.0130885	BIRC3	baculoviral IAP repeat-containing 3
204820_s_at	0.000206	0.00809572	BTN3A3	butyrophilin, subfamily 3, member A3
203477_at	0.000207	0.0119043	COL15A1	collagen, type XV, alpha 1
215176_x_at	0.000208	0.0355347	IGKC	immunoglobulin kappa constant
239764_at	0.00021	-0.00410907	---	Homo sapiens mRNA; cDNA DKFZp686D1113 (from clone DKFZp686D1113)
205692_s_at	0.00021	0.00316994	CD38	CD38 antigen (p45)
230061_at	0.000211	0.00950924	LOC116441	hypothetical protein BC014339
229605_at	0.000211	-0.00237884	LOC200008	hypothetical protein LOC200008
215300_s_at	0.000212	-0.00509968	FMO5	flavin containing monooxygenase 5
239332_at	0.000213	0.00324784	---	Homo sapiens, clone IMAGE:3897156, mRNA
205488_at	0.000213	0.0102699	GZMA	granzyme A (granzyme 1, cytotoxic T-lymphocyte-associated serine esterase 3)
207927_at	0.000213	0.0040748	HTR7	5-hydroxytryptamine (serotonin) receptor 7 (adenylate cyclase-coupled)
203961_at	0.000214	-0.00861332	---	---
201126_s_at	0.000216	0.00290661	MGAT1	mannosyl (alpha-1,3-)-glycoprotein beta-1,2-N-acetylglucosaminyltransferase
212489_at	0.000216	0.00812312	COL5A1	collagen, type V, alpha 1
201917_s_at	0.000219	-0.00607701	FLJ10618	hypothetical protein FLJ10618
209165_at	0.00022	0.00259029	AATF	apoptosis antagonizing transcription factor
200022_at	0.000221	0.00630472	RPL18	ribosomal protein L18
226875_at	0.000223	0.00808571	FLJ32122	hypothetical protein FLJ32122
214400_at	0.000224	0.00446813	INSL3	insulin-like 3 (Leydig cell)
226219_at	0.000226	0.00503739	LOC257106	hypothetical protein LOC257106
217795_s_at	0.000227	0.00312348	MGC3222	hypothetical protein MGC3222
219431_at	0.000229	0.00457509	FLJ20896	hypothetical protein FLJ20896
209243_s_at	0.000229	-0.00882249	ZIM2	zinc finger, imprinted 2
218716_x_at	0.00023	-0.00360544	MTO1	MTO1 protein
221827_at	0.000231	0.00537118	C20orf18	chromosome 20 open reading frame 18
211340_s_at	0.000232	0.00967202	MCAM	melanoma cell adhesion molecule
224356_x_at	0.000233	0.00736621	MS4A6A	membrane-spanning 4-domains, subfamily A, member 6A
233959_at	0.000235	0.00395533	---	---
209946_at	0.000235	0.00432487	VEGFC	vascular endothelial growth factor C
206687_s_at	0.000237	0.0049364	PTPN6	protein tyrosine phosphatase, non-receptor type 6
200088_x_at	0.000237	0.00762653	---	---
211615_s_at	0.000238	-0.00470421	LRPPRC	leucine-rich PPR-motif containing
212827_at	0.000239	0.0104881	IGHM	immunoglobulin heavy constant mu
210236_at	0.00024	-0.00366428	PPFIA1	protein tyrosine phosphatase, receptor type, f polypeptide (PTPRF), interacting protein (liprin), alpha 1
210409_at	0.00024	-0.0052109	MLLT4	myeloid/lymphoid or mixed-lineage leukemia (trithorax homolog, Drosophila); translocated to, 4
206874_s_at	0.000241	-0.00622819	SLK	Ste20-related serine/threonine kinase
214428_x_at	0.000242	0.0180348	C4A	complement component 4A
223773_s_at	0.000242	0.00637842	LOC85028	PNAS-123
201689_s_at	0.000244	-0.00732694	TPD52	tumor protein D52
221986_s_at	0.000247	-0.00741344	FLJ20059	hypothetical protein FLJ20059
219714_s_at	0.000249	-0.00288762	CACNA2D3	calcium channel, voltage-dependent, alpha 2/delta 3 subunit
238604_at	0.000251	0.00582465	---	Homo sapiens cDNA FLJ25559 fis, clone JTH02834.
220925_at	0.000253	-0.00500475	FLJ21613	hypothetical protein FLJ21613 similar to rat corneal wound healing related protein
208451_s_at	0.000253	0.0155855	C4B	complement component 4B
228051_at	0.000253	-0.0056066	LOC202451	hypothetical protein LOC202451
217378_x_at	0.000254	0.0317801	---	---
217763_s_at	0.000254	0.00631785	RAB31	RAB31, member RAS oncogene family
203954_x_at	0.000255	0.00593483	CLDN3	claudin 3
213714_at	0.000257	-0.00503865	CACNB2	calcium channel, voltage-dependent, beta 2 subunit
204537_s_at	0.000262	0.00591177	GABRE	gamma-aminobutyric acid (GABA) A receptor, epsilon
200076_s_at	0.000264	0.00310343	MGC2749	hypothetical protein MGC2749
215150_at	0.000265	-0.00473659	---	PRO0131 [Homo sapiens], mRNA sequence
213738_s_at	0.000265	-0.00448112	ATP5A1	ATP synthase, H+ transporting, mitochondrial F1 complex, alpha subunit, isoform 1, cardiac muscle
231268_at	0.000266	-0.00324493	---	Homo sapiens, clone IMAGE:5222754, mRNA, partial cds
225868_at	0.000266	0.00757584	TRIM47	tripartite motif-containing 47
202185_at	0.000267	0.0034586	PLOD3	procollagen-lysine, 2-oxoglutarate 5-dioxygenase 3
201871_s_at	0.000267	0.00387605	LOC51035	ORF
214433_s_at	0.000269	-0.00914335	SELENBP1	selenium binding protein 1
208894_at	0.000269	0.0126091	HLA-DRA	major histocompatibility complex, class II, DR alpha
205081_at	0.00027	0.00557551	CRIP1	cysteine-rich protein 1 (intestinal)
224928_at	0.00027	0.00554131	SET7	SET domain-containing protein 7
213832_at	0.00027	0.00426007	---	Homo sapiens clone 24405 mRNA sequence
200986_at	0.000271	0.00976554	SERPING1	serine (or cysteine) proteinase inhibitor, clade G (C1 inhibitor), member 1, (angioedema, hereditary)
203423_at	0.000272	0.00551778	RBP1	retinol binding protein 1, cellular
230836_at	0.000276	0.00762034	---	Homo sapiens, clone IMAGE:4816784, mRNA
226074_at	0.000276	0.00314831	CD74	CD74 antigen (invariant polypeptide of major histocompatibility complex, class II antigen-associated)
200795_at	0.000278	0.0104762	SPARCL1	SPARC-like 1 (mast9, hevin)
205413_at	0.000278	-0.0107418	C11orf8	chromosome 11 open reading frame 8
228333_at	0.00028	0.00890361	---	Homo sapiens full length insert cDNA clone YT94E02
213363_at	0.00028	0.002965	---	Unknown (protein for IMAGE:3460742) [Homo sapiens], mRNA sequence
226725_at	0.00028	0.00388028	---	ESTs
208704_x_at	0.000281	-0.00333217	APLP2	amyloid beta (A4) precursor-like protein 2
214920_at	0.000281	-0.0085147	---	Homo sapiens cDNA FLJ11022 fis, clone PLACE1003771, mRNA sequence
241525_at	0.000281	-0.00467439	LOC200772	hypothetical protein LOC200772
224915_x_at	0.000282	0.00709335	---	Homo sapiens, clone IMAGE:5285034, mRNA
210605_s_at	0.000282	0.00436387	MFGE8	milk fat globule-EGF factor 8 protein
221253_s_at	0.000282	0.00656735	MGC3178	thioredoxin related protein
200003_s_at	0.000284	0.00899401	RPL28	ribosomal protein L28
220129_at	0.000284	-0.00391421	FLJ20449	hypothetical protein FLJ20449
227550_at	0.000285	0.00624476	LOC143381	hypothetical protein LOC143381
212566_at	0.000285	0.00484261	MAP4	microtubule-associated protein 4
201030_x_at	0.000285	-0.00480473	LDHB	lactate dehydrogenase B
209795_at	0.000288	0.0161845	CD69	CD69 antigen (p60, early T-cell activation antigen)
230466_s_at	0.000289	0.0146855	---	Homo sapiens mesenchymal stem cell protein DSC96 mRNA, partial cds
239446_x_at	0.000292	-0.00410222	ESDN	endothelial and smooth muscle cell-derived neuropilin-like protein
203940_s_at	0.000293	0.00491573	KIAA1036	KIAA1036 protein
235385_at	0.000294	0.00609205	---	Homo sapiens cDNA FLJ34016 fis, clone FCBBF2002541.
209590_at	0.000295	-0.00354648	BMP7	bone morphogenetic protein 7 (osteogenic protein 1)
205875_s_at	0.000295	0.00218702	TREX1	three prime repair exonuclease 1
224694_at	0.000297	0.0106565	TEM8	tumor endothelial marker 8
204178_s_at	0.000299	-0.0036421	RBM14	RNA binding motif protein 14
202766_s_at	0.000301	0.0106271	FBN1	fibrillin 1 (Marfan syndrome)
238809_at	0.000303	0.00424865	---	ESTs
207173_x_at	0.000306	0.012393	CDH11	cadherin 11, type 2, OB-cadherin (osteoblast)
201818_at	0.000308	0.00551547	FLJ12443	hypothetical protein FLJ12443
224964_s_at	0.000309	0.0075296	GNG2	guanine nucleotide binding protein (G protein), gamma 2
228094_at	0.000312	0.00490406	AMICA	adhesion molecule AMICA
243271_at	0.000314	0.00329462	---	ESTs
216598_s_at	0.000317	0.0164935	CCL2	chemokine (C-C motif) ligand 2
210825_s_at	0.000317	-0.00739199	PBP	prostatic binding protein
235269_at	0.000318	-0.00279488	LOC113828	hypothetical protein BC011204
230645_at	0.000321	-0.00546232	MGC20553	band 4.1-like protein 4
243374_x_at	0.000321	0.00372744	---	ESTs
200618_at	0.000321	0.00558902	LASP1	LIM and SH3 protein 1
209960_at	0.000322	0.015194	HGF	hepatocyte growth factor (hepapoietin A; scatter factor)
208658_at	0.000323	0.0055176	ERP70	protein disulfide isomerase related protein (calcium-binding protein, intestinal-related)
214598_at	0.000326	-0.0151347	CLDN8	claudin 8
242264_at	0.000327	-0.00331562	---	ESTs, Weakly similar to neuronal thread protein [Homo sapiens] [H.sapiens]
206767_at	0.000328	0.00613835	RBMS3	RNA binding motif, single stranded interacting protein
220273_at	0.00033	0.00418155	IL17B	interleukin 17B
201762_s_at	0.000331	0.00614593	PSME2	proteasome (prosome, macropain) activator subunit 2 (PA28 beta)
215076_s_at	0.000333	0.0156108	COL3A1	collagen, type III, alpha 1 (Ehlers-Danlos syndrome type IV, autosomal dominant)
227893_at	0.000334	-0.00306212	---	Homo sapiens NAG11 (NAG11) mRNA, complete cds
214945_at	0.000334	-0.00797986	KIAA0752	KIAA0752 protein
214916_x_at	0.000334	0.0138536	IGHM	immunoglobulin heavy constant mu
202686_s_at	0.000335	0.00470857	AXL	AXL receptor tyrosine kinase
200003_s_at	0.000335	0.00671065	RPL28	ribosomal protein L28
209274_s_at	0.000337	-0.00447153	MGC4276	hypothetical protein MGC4276 similar to CG8198
209506_s_at	0.000339	0.00436893	NR2F1	nuclear receptor subfamily 2, group F, member 1
208306_x_at	0.000342	0.00621835	HLA-DRB4	major histocompatibility complex, class II, DR beta 4
204182_s_at	0.000344	-0.00435875	ZNF297B	zinc finger protein 297B
222976_s_at	0.000345	0.0060815	TPM3	tropomyosin 3
223431_at	0.000346	0.00403306	FLJ11230	hypothetical protein FLJ11230
219205_at	0.000348	-0.00357089	SRR	serine racemase
201852_x_at	0.000349	0.0155342	COL3A1	collagen, type III, alpha 1 (Ehlers-Danlos syndrome type IV, autosomal dominant)
200002_at	0.00035	0.00608389	RPL35	ribosomal protein L35
235199_at	0.000351	0.00743576	---	ESTs, Weakly similar to PRTC_HUMAN Vitamin-K dependent protein C precursor (Autoprothrombin IIA) (Anticoagulant protein C) (Blood coagulation factor XIV) [H.sapiens]
243562_at	0.000351	-0.0138586	KNG	kininogen
212790_x_at	0.000352	0.00416975	RPL13A	ribosomal protein L13a
202780_at	0.000353	-0.00890706	OXCT	3-oxoacid CoA transferase
211650_x_at	0.000353	0.0155774	IGHM	immunoglobulin heavy constant mu
242957_at	0.000353	0.00240638	FLJ32009	hypothetical protein FLJ32009
224710_at	0.000354	0.0053085	RAB34	RAB34, member RAS oncogene family
226035_at	0.000358	0.003403	KIAA1203	KIAA1203 protein
212445_s_at	0.00036	-0.00612159	NEDD4L	neural precursor cell expressed, developmentally down-regulated 4-like
203962_s_at	0.000361	-0.00910565	NEBL	nebulette
214629_x_at	0.000363	-0.00505899	RTN4	reticulon 4
225931_s_at	0.000364	0.0053326	KIAA1554	KIAA1554 protein
226731_at	0.000364	0.00706409	ALB	albumin
230708_at	0.000365	0.00708125	---	Homo sapiens cDNA FLJ11666 fis, clone HEMBA1004672.
225710_at	0.000366	0.00764644	---	Homo sapiens cDNA FLJ34013 fis, clone FCBBF2002111.
216189_at	0.000366	-0.00565943	---	Unknown (protein for IMAGE:3344506) [Homo sapiens], mRNA sequence
200654_at	0.000369	0.00535111	P4HB	procollagen-proline, 2-oxoglutarate 4-dioxygenase (proline 4-hydroxylase), beta polypeptide (protein disulfide isomerase; thyroid hormone binding protein p55)
229860_x_at	0.000371	0.00707155	---	ESTs
241524_at	0.000373	-0.00512829	---	ESTs
227140_at	0.000375	0.0196255	---	Homo sapiens cDNA FLJ11041 fis, clone PLACE1004405.
221004_s_at	0.000375	0.00723671	ITM2C	integral membrane protein 2C
231856_at	0.000377	-0.00578929	KIAA1244	KIAA1244 protein
201599_at	0.00038	-0.00546942	OAT	ornithine aminotransferase (gyrate atrophy)
213497_at	0.00038	-0.00339707	DKFZP586C1619	DKFZP586C1619 protein
1405_i_at	0.000381	0.0085445	CCL5	chemokine (C-C motif) ligand 5
212181_s_at	0.000381	-0.00583579	NUDT4	nudix (nucleoside diphosphate linked moiety X)-type motif 4
228570_at	0.000381	-0.00525193	FLJ33957	hypothetical protein FLJ33957
219947_at	0.000382	0.00741762	CLECSF6	C-type (calcium dependent, carbohydrate-recognition domain) lectin, superfamily member 6
241347_at	0.000385	0.00433103	KIAA1618	KIAA1618 protein
218318_s_at	0.000385	-0.00304689	NLK	nemo-like kinase
201635_s_at	0.00039	-0.00402528	FXR1	fragile X mental retardation, autosomal homolog 1
216557_x_at	0.000395	0.0218134	IGHG3	immunoglobulin heavy constant gamma 3 (G3m marker)
222747_s_at	0.000398	-0.00358316	SCML1	sex comb on midleg-like 1 (Drosophila)
232024_at	0.0004	0.00798484	HIMAP2	immunity associated protein 2
207752_x_at	0.000404	0.00489136	PRB1	proline-rich protein BstNI subfamily 1
211366_x_at	0.000407	0.00351693	CASP1	caspase 1, apoptosis-related cysteine protease (interleukin 1, beta, convertase)
203379_at	0.000408	0.00286579	RPS6KA1	ribosomal protein S6 kinase, 90kDa, polypeptide 1
212070_at	0.000409	0.0066185	GPR56	G protein-coupled receptor 56
227095_at	0.000411	0.00638169	---	Homo sapiens cDNA FLJ13536 fis, clone PLACE1006521.
226496_at	0.000411	0.00793543	FLJ22611	hypothetical protein FLJ22611
238530_at	0.000412	-0.00538559	NNT	nicotinamide nucleotide transhydrogenase
201079_at	0.000415	0.00403093	SYNGR2	synaptogyrin 2
202156_s_at	0.000417	0.00700166	CUGBP2	CUG triplet repeat, RNA binding protein 2
206980_s_at	0.000425	0.00345826	FLT3LG	fms-related tyrosine kinase 3 ligand
217360_x_at	0.000426	0.0105347	---	---
213353_at	0.000434	-0.00634715	ABCA5	ATP-binding cassette, sub-family A (ABC1), member 5
240830_at	0.000435	0.00392536	---	ESTs
223361_at	0.000436	0.00934245	PRO2013	hypothetical protein PRO2013
227697_at	0.00044	0.0226384	SOCS3	suppressor of cytokine signaling 3
205174_s_at	0.000441	0.0145577	QPCT	glutaminyl-peptide cyclotransferase (glutaminyl cyclase)
202208_s_at	0.000442	0.0115936	ARL7	ADP-ribosylation factor-like 7
205784_x_at	0.000442	0.00342636	ARVCF	armadillo repeat gene deletes in velocardiofacial syndrome
205343_at	0.000443	-0.00891686	SULT1C1	sulfotransferase family, cytosolic, 1C, member 1
211587_x_at	0.000443	0.00445519	CHRNA3	cholinergic receptor, nicotinic, alpha polypeptide 3
202404_s_at	0.000447	0.0140164	COL1A2	collagen, type I, alpha 2
32402_s_at	0.000447	0.00485291	SPK	symplekin; Huntingtin interacting protein I
213728_at	0.000448	0.00472561	LAMP1	lysosomal-associated membrane protein 1
229973_at	0.000448	0.00344727	DKFZp547I048	hypothetical protein DKFZp547I048
208130_s_at	0.00045	0.00445389	TBXAS1	thromboxane A synthase 1 (platelet, cytochrome P450, subfamily V)
214247_s_at	0.00045	0.00970396	RIG	regulated in glioma
200095_x_at	0.000451	0.00589525	RPS10	ribosomal protein S10
200091_s_at	0.000451	0.00643587	RPS25	ribosomal protein S25
213531_s_at	0.000452	0.00275548	RAB3GAP	RAB3 GTPase-ACTIVATING PROTEIN
229625_at	0.000452	0.00436696	GBP5	guanylate binding protein 5
216913_s_at	0.000456	0.00377225	KIAA0690	KIAA0690 protein
209448_at	0.000456	0.00516013	HTATIP2	HIV-1 Tat interactive protein 2, 30kDa
212791_at	0.000458	0.00394534	FLJ38984	hypothetical protein FLJ38984
213811_x_at	0.000461	0.00290235	TCF3	transcription factor 3 (E2A immunoglobulin enhancer binding factors E12/E47)
202403_s_at	0.000462	0.0116712	COL1A2	collagen, type I, alpha 2
218002_s_at	0.000462	0.0117268	CXCL14	chemokine (C-X-C motif) ligand 14
202110_at	0.000462	-0.005083	COX7B	cytochrome c oxidase subunit VIIb
208659_at	0.000462	0.00555189	CLIC1	chloride intracellular channel 1
210968_s_at	0.000463	-0.00495505	RTN4	reticulon 4
218567_x_at	0.000464	0.00334216	DPP3	dipeptidylpeptidase III
227400_at	0.000469	0.00633408	NFIX	nuclear factor I/X (CCAAT-binding transcription factor)
218943_s_at	0.00047	0.00366161	RIG-I	DEAD/H (Asp-Glu-Ala-Asp/His) box polypeptide
213258_at	0.000471	0.00884183	---	ESTs, Weakly similar to ubiquitously transcribed tetratricopeptide repeat gene, Y chromosome; Ubiquitously transcribed TPR gene on Y chromosome [Homo sapiens] [H.sapiens]
204961_s_at	0.000472	0.00440987	NCF1	neutrophil cytosolic factor 1 (47kDa, chronic granulomatous disease, autosomal 1)
232914_s_at	0.000476	0.00917038	SYTL2	synaptotagmin-like 2
200905_x_at	0.000477	0.00592345	HLA-E	major histocompatibility complex, class I, E
227829_at	0.000478	-0.00342965	FLJ35207	hypothetical protein FLJ35207
218350_s_at	0.000478	-0.00877896	GMNN	geminin, DNA replication inhibitor
217239_x_at	0.000479	0.0264265	---	---
221798_x_at	0.000481	0.00432552	RPS2	ribosomal protein S2
57082_at	0.000482	0.00261012	ARH	LDL receptor adaptor protein
228521_s_at	0.000483	0.00468834	RAB4B	RAB4B, member RAS oncogene family
204701_s_at	0.000485	0.00200349	STOML1	stomatin (EPB72)-like 1
221543_s_at	0.000486	-0.00523257	C8orf2	chromosome 8 open reading frame 2
65630_at	0.00049	-0.00495988	---	Similar to RIKEN cDNA 5530601I19 gene [Homo sapiens], mRNA sequence
202336_s_at	0.000491	0.00492203	PAM	peptidylglycine alpha-amidating monooxygenase
200757_s_at	0.000491	0.00250043	CALU	calumenin
230532_at	0.000492	0.00487621	MGC39350	hypothetical protein MGC39350
229256_at	0.000496	0.00613646	FLJ32029	hypothetical protein FLJ32029
225293_at	0.000496	0.00660088	KIAA1870	KIAA1870 protein
211458_s_at	0.000498	-0.00660416	GABARAPL3	GABA(A) receptors associated protein like 3
226633_at	0.000499	0.00712192	---	Homo sapiens mRNA; cDNA DKFZp667O1616 (from clone DKFZp667O1616)
204558_at	0.0005	0.0041019	RAD54L	RAD54-like (S. cerevisiae)
219040_at	0.000502	0.00254416	FLJ22021	hypothetical protein FLJ22021
209196_at	0.000503	0.00291849	C6orf11	chromosome 6 open reading frame 11
229248_at	0.000505	-0.00365477	---	ESTs
208248_x_at	0.000506	-0.00334435	APLP2	amyloid beta (A4) precursor-like protein 2
210833_at	0.000509	-0.00782591	PTGER3	prostaglandin E receptor 3 (subtype EP3)
218432_at	0.000509	-0.00611498	FBXO3	F-box only protein 3
210650_s_at	0.000512	-0.00604325	PCLO	piccolo (presynaptic cytomatrix protein)
214803_at	0.000513	0.014973	---	Homo sapiens mRNA; cDNA DKFZp564N1116 (from clone DKFZp564N1116), mRNA sequence
228988_at	0.000514	-0.00689585	ZNF6	zinc finger protein 6 (CMPX1)
225190_x_at	0.000521	0.00524226	RPL35A	ribosomal protein L35a
216383_at	0.000521	0.00629144	---	---
218872_at	0.000522	0.00916688	TSC	hypothetical protein FLJ20607
225524_at	0.000523	0.00668666	CMG2	capillary morphogenesis protein 2
215719_x_at	0.000526	0.00698081	TNFRSF6	tumor necrosis factor receptor superfamily, member 6
203335_at	0.000527	-0.00775221	PHYH	phytanoyl-CoA hydroxylase (Refsum disease)
207134_x_at	0.000527	0.00602428	TPSB2	tryptase beta 2
218387_s_at	0.000528	0.00424902	PGLS	6-phosphogluconolactonase
212175_s_at	0.000529	-0.00442568	FLJ10101	hypothetical protein FLJ10101
200736_s_at	0.000529	0.00697252	GPX1	glutathione peroxidase 1
40420_at	0.000533	0.00288151	STK10	serine/threonine kinase 10
212448_at	0.000534	-0.00580836	NEDD4L	neural precursor cell expressed, developmentally down-regulated 4-like
211303_x_at	0.000535	-0.00574347	PSMAL/GCP III	prostate-specific membrane antigen-like protein
203879_at	0.000548	0.00523027	PIK3CD	phosphoinositide-3-kinase, catalytic, delta polypeptide
200019_s_at	0.000548	0.00615214	FAU	Finkel-Biskis-Reilly murine sarcoma virus (FBR-MuSV) ubiquitously expressed (fox derived); ribosomal protein S30
202117_at	0.000554	0.00536395	ARHGAP1	Rho GTPase activating protein 1
219423_x_at	0.000558	0.00430958	TNFRSF25	tumor necrosis factor receptor superfamily, member 25
216224_s_at	0.00056	-0.00262434	HDAC6	histone deacetylase 6
219620_x_at	0.000563	0.00564046	FLJ20245	hypothetical protein FLJ20245
206900_x_at	0.000563	-0.00335476	ZNF253	zinc finger protein 253
239519_at	0.000564	0.0123412	---	ESTs
206054_at	0.00057	-0.018589	KNG	kininogen
244011_at	0.000571	-0.00276102	DKFZp761G058	hypothetical protein DKFZp761G058
207413_s_at	0.000572	0.0043669	SCN5A	sodium channel, voltage-gated, type V, alpha polypeptide (long (electrocardiographic) QT syndrome 3)
238373_at	0.000577	-0.00325117	---	ESTs, Weakly similar to S3B1_HUMAN Splicing factor 3B subunit 1 (Spliceosome associated protein 155) (SAP 155) (SF3b155) (Pre-mRNA splicing factor SF3b 155 kDa subunit) [H.sapiens]
212190_at	0.000582	0.00966702	SERPINE2	serine (or cysteine) proteinase inhibitor, clade E (nexin, plasminogen activator inhibitor type 1), member 2
206666_at	0.000582	0.00591248	GZMK	granzyme K (serine protease, granzyme 3; tryptase II)
223322_at	0.000583	0.00742056	NORE1	NORE1 protein
219732_at	0.000584	-0.0101345	FLJ20300	hypothetical protein FLJ20300
223194_s_at	0.000587	-0.00400134	FLJ22174	hypothetical protein FLJ22174
226096_at	0.000589	-0.00217601	FRCP2	likely ortholog of mouse fibronectin type III repeat containing protein 2
217512_at	0.000591	-0.0136109	---	ESTs, Moderately similar to KNG_HUMAN Kininogen precursor (Alpha-2-thiol proteinase inhibitor) [Contains: Bradykinin] [H.sapiens]
218358_at	0.000591	0.00462823	MGC11256	hypothetical protein MGC11256
239933_x_at	0.000593	-0.00324763	---	ESTs
216194_s_at	0.000593	0.00483843	CKAP1	cytoskeleton-associated protein 1
204123_at	0.000596	0.00240534	LIG3	ligase III, DNA, ATP-dependent
212671_s_at	0.000599	0.0147973	HLA-DQA1	major histocompatibility complex, class II, DQ alpha 1
219774_at	0.000602	-0.00294384	FLJ10996	hypothetical protein FLJ10996
65521_at	0.000602	0.00311084	LOC51619	ubiquitin-conjugating enzyme HBUCE1
215316_at	0.000602	-0.00360597	---	Homo sapiens mRNA; cDNA DKFZp434M091 (from clone DKFZp434M091), mRNA sequence
211094_s_at	0.000604	-0.00342572	NF1	neurofibromin 1 (neurofibromatosis, von Recklinghausen disease, Watson disease)
205592_at	0.000605	-0.0108499	---	Anion exchanger [Homo sapiens], mRNA sequence
239082_at	0.000606	0.00258638	---	Homo sapiens, clone IMAGE:5311370, mRNA
231887_s_at	0.000606	0.00360889	KIAA1274	KIAA protein (similar to mouse paladin)
223929_s_at	0.000607	-0.00245456	MGC3413	hypothetical protein MGC3413
201004_at	0.000608	0.00664298	SSR4	signal sequence receptor, delta (translocon-associated protein delta)
204215_at	0.000611	0.00472491	MGC4175	hypothetical protein MGC4175
235061_at	0.000612	-0.00763511	DKFZp761G058	hypothetical protein DKFZp761G058
230008_at	0.000615	-0.00573704	---	Homo sapiens, clone IMAGE:4791783, mRNA
231276_at	0.000615	-0.00327676	PDE3B	phosphodiesterase 3B, cGMP-inhibited
209341_s_at	0.000617	0.00452474	IKBKB	inhibitor of kappa light polypeptide gene enhancer in B-cells, kinase beta
204143_s_at	0.000617	-0.00636812	HSRTSBETA	rTS beta protein
230925_at	0.000619	0.00474736	APBB1IP	amyloid beta (A4) precursor protein-binding, family B, member 1 interacting protein
223218_s_at	0.00062	0.0148122	MAIL	molecule possessing ankyrin repeats induced by lipopolysaccharide (MAIL), homolog of mouse
221872_at	0.000622	0.0140239	RARRES1	retinoic acid receptor responder (tazarotene induced) 1
